# Supplementary material for: Facile preparation of a Ag/graphene electrocatalyst with high activity for the oxygen reduction reaction
Source: Royal Society of Chemistry journal article supplement (doi:10.1039/d0ra02127j), 2020-01-01
Supplement: d0ra02127j1.pdf [file d0ra02127j1.pdf]

## Supplementary Information:

### Facile Preparation of Ag/Graphene Electrocatalyst with High Activity for the Oxygen Reduction Reaction

Yaqi Ren,<sup>a,b</sup> Hong Zhao,<sup>\*c</sup> Jianpeng Li,<sup>d</sup> Rui Wang<sup>a</sup> and Zhaohuan Wei<sup>\*e, f</sup>

a. School of Materials and Environmental Engineering, Chengdu Technological University, Chengdu, 611730, China.

b. Center of Big Data for Smart Environmental Protection, Chengdu Technological University, Chengdu 611730, China.

c. School of Materials Science and Energy Engineering, Foshan University, Foshan, 528225, China.

d. School of Chemistry and Materials Engineering, Huizhou University, Huizhou, 516007, China.

e. School of Physics, University of Electronic Science and Technology of China, Chengdu, 611731, China.

f. Guangdong Provincial Key Laboratory of Energy Materials for Electric Power, Shenzhen 518055, China.

\* Email Address: mezhao hong@gmail.com (Dr. Hong Zhao); zhwei@uestc.edu.cn (Dr. Zhaohuan Wei).

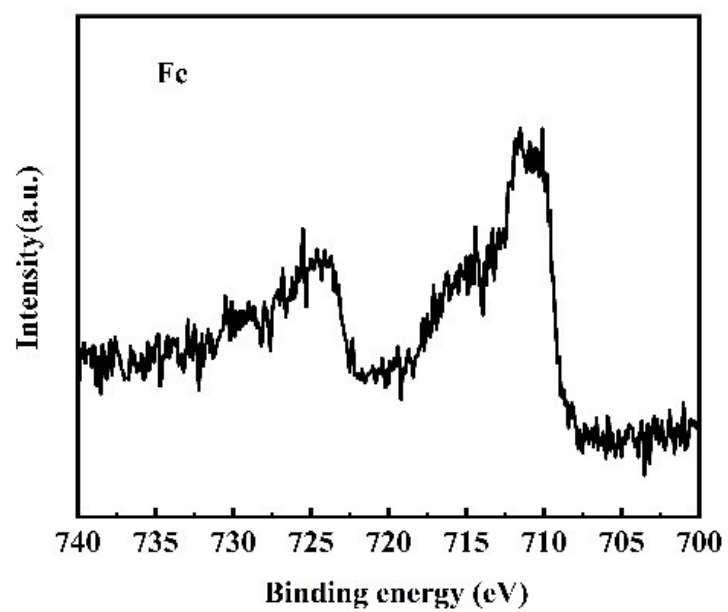

Fig. S1 XPS spectrum of Fe element of Ag/graphene

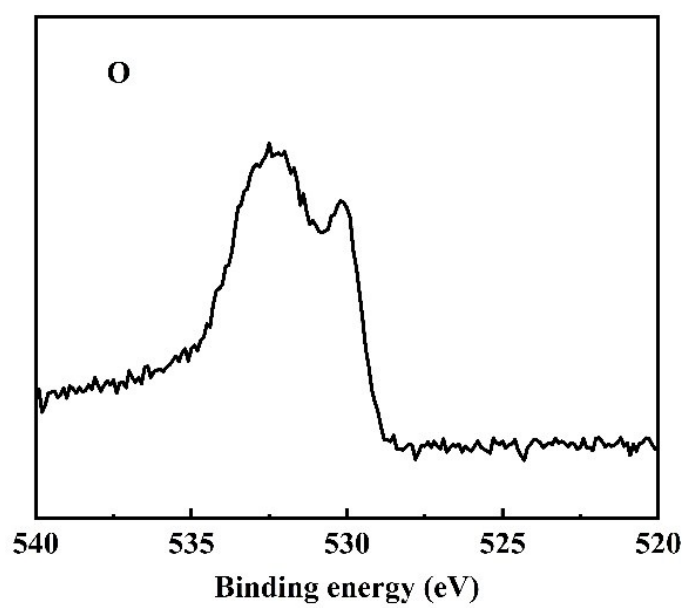

Fig. S2 XPS spectrum of O element of Ag/graphene

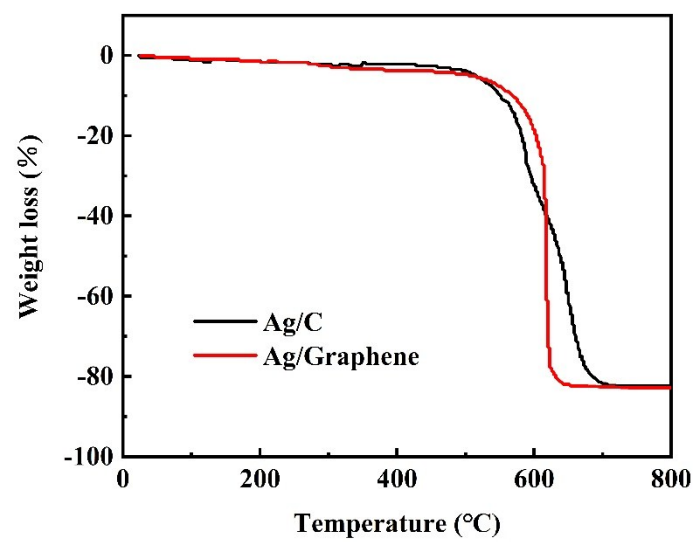

Fig. S3 TG curves of Ag/graphene and Ag/C samples
